# Supplementary material
Source: Springer Nature journal article supplement (https://www.springermedizin.de/resource/supplementary/12889_2010_3096_MOESM2_ESM.pdf/9488172)
Supplement: MOESM2 [file 9488172]

Period in which influenza infection could be associated with GBS cases during the "period of interest"

First 9 weeks of immunization campaign

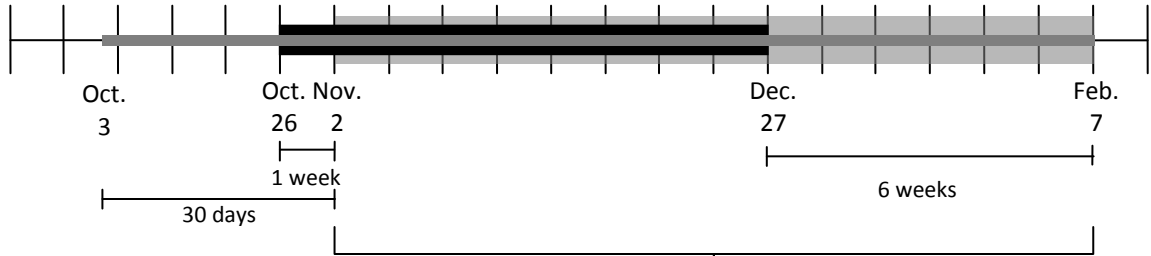

**Period of interest:**

Period in which GBS cases associated with vaccination within the first 9 weeks of the campaign and influenza infection could be expected to occur
